# Supplementary material for: Genomic insights into anthropozoonotic tuberculosis in captive sun bears (Helarctos malayanus) and an Asiatic black bear (Ursus thibetanus) in Cambodia
Source: Springer Nature journal article supplement (doi:10.1038/s41598-024-57318-1), 2024-03-28
Supplement: MOESM1 [file 41598_2024_57318_MOESM1_ESM.pdf]

## **Supplementary Material 1: Genotyping methods and results**

### **Genotyping methods**

#### **DNA preparation**

*M. tuberculosis* isolates were re-cultured on LJ medium slants, and a loopful of *M. tuberculosis* colonies suspended in 300 µL of Tris-EDTA buffer (10 mM Tris, 1mM EDTA pH 8.5) and heated for 30 min at 95°C. After centrifugation the supernatant containing bacterial DNA was used as a template for PCR based genotyping techniques.

#### **Spoligotyping**

Spoligotyping was performed on one isolate from each case (n=32), following previously described techniques [1]. The DNA of *M. tuberculosis* H37Rv and *M. bovis* BCG were included as positive controls. Spoligotype patterns were coded as a binary number and entered into the international genotyping database SITVIT2 (available at <http://www.pasteur-guadeloupe.fr:8081/SITVIT2/>) to identify the spoligotype international type (SIT) [2].

#### **Mycobacterial Interspersed Repetitive Unit – Variable Number Tandem Repeat (MIRU-VNTR) typing**

MIRU-VNTR typing was performed on one isolate from the first 20 cases, by PCR amplifying 24 loci sets as described by Supply et al. [3]. PCR analyses were carried out manually for each of 24 loci. PCR fragments were separated by electrophoresis using a 1.5% agarose gel. The amplicon size was estimated by comparison with a 100 bp molecular marker. The number of repeats at each locus was calculated using an allele-calling table and used to

create a 24-digit allelic profile for each isolate [3]. The results were analysed using the MIRU-VNTRplus database (available at [www.miru-vntrplus.org/](http://www.miru-vntrplus.org/)) [4].

## **Genotyping results**

### **Spoligotyping**

The spoligotype patterns of the 32 *M. tuberculosis* isolates (31 bear-origin and 1 human-origin) were compared to the SITVIT2 database and revealed two patterns (Table S1). The most frequent spoligotype pattern, represented by the octal code 777777777413731 and shared by 21 bear origin isolates, belonged to Spoligo-international-type (SIT) 48 in the EAI1-SOM clade of the East African-Indian (EAI) family of Lineage 1 (Indo-Oceanic). The remaining 11 isolates (ten bear-origin and one human-origin) revealed a SIT1 spoligotype pattern, represented by the octal code 00000000003771 and belonging to the Beijing family of Lineage 2 (East Asian). The 11 Beijing family isolates were the same 11 isolates with drug resistance to isoniazid and streptomycin, while all the EAI family isolates were pan-sensitive.

### **Mycobacterial Interspersed Repetitive Unit – Variable Number Tandem Repeat (MIRU-VNTR) typing**

MIRU- VNTR typing of an isolate from each of the first 20 cases (19 bear and one human) revealed three patterns, including two clusters and one unique profile (Table 1). The first cluster contained eight Beijing family isolates (seven bear-origin, one human-origin), and the second cluster contained 11 of 12 bear-origin isolates with the EAI family spoligotype. The single unique MIRU-VNTR profile belonged to case E07's isolate and showed variation in the number of repeats at locus 802 compared to the other isolates in the second cluster.

## References

1. Kamerbeek, J., et al. Simultaneous detection and strain differentiation of *Mycobacterium tuberculosis* for diagnosis and epidemiology. *J Clin Microbiol.* **35**, 907-914 <https://doi.org/10.1128/jcm.35.4.907-914.1997> (1997).
2. Couvin, D., David, A., Zozio, T. & Rastogi, N. Macro-geographical specificities of the prevailing tuberculosis epidemic as seen through SITVIT2, an updated version of the *Mycobacterium tuberculosis* genotyping database. *Infect Genet Evol.* **72**, 31-43 <https://doi.org/10.1016/j.meegid.2018.12.030> (2019).
3. Supply, P., et al. Proposal for standardization of optimized mycobacterial interspersed repetitive unit-variable-number tandem repeat typing of *Mycobacterium tuberculosis*. *J Clin Microbiol.* **44**, 4498-510 <https://doi.org/10.1128/jcm.01392-06> (2006).
4. Weniger, T., Krawczyk, J., Supply, P., Niemann, S. & Harmsen, D. MIRU-VNTRplus: a web tool for polyphasic genotyping of *Mycobacterium tuberculosis* complex bacteria. *Nucleic Acids Res.* **38**, W326-31 <https://doi.org/10.1093/nar/gkq351> (2010).

**Table S1.** Drug susceptibility, spoligotype lineage and Mycobacterial Interspersed Repetitive Unit – Variable Number Tandem Repeat (MIRU-VNTR) type results of *Mycobacterium tuberculosis* isolates from 30 sun bears (*Helarctos malayanus*), one Asiatic black bear (*Ursus thibetanus*) and one human case at the Cambodia Bear Sanctuary, in chronological order by sampling date and including the date of each bear’s arrival at the sanctuary and their age at the time of sampling

| Case             | Species | Age (y) | Arrival date | Sample date | Drug susceptibility<br>STM/INH/<br>RIF/EMB | Spoligotype lineage (SIT) | MIRU-VNTR numeric code   |
|------------------|---------|---------|--------------|-------------|--------------------------------------------|---------------------------|--------------------------|
| <b>Reference</b> |         |         |              |             |                                            |                           | 22431322534236133335522  |
| <b>B1</b>        | SB      | 4       | Apr 2007     | Dec 2009    | R/R/S/S                                    | Beijing (SIT1)            | 244233262544424183353823 |
| <b>B2</b>        | SB      | 5       | Jan 2006     | Jan 2011    | R/R/S/S                                    | Beijing (SIT1)            | 244233262544424183353823 |
| <b>Hu</b>        | Human   | NA      | NA           | Jul 2011    | R/R/S/S                                    | Beijing (SIT1)            | 244233262544424183353823 |
| <b>E1</b>        | SB      | 16      | Oct 2011     | Dec 2011    | S/S/S/S                                    | EAI1-SOM (SIT48)          | 224734152263245223354613 |
| <b>E2</b>        | SB      | 20      | Aug 1996     | Mar 2014    | S/S/S/S                                    | EAI1-SOM (SIT48)          | 224734152263245223354613 |
| <b>E3</b>        | SB      | 20      | Dec 2008     | Jul 2015    | S/S/S/S                                    | EAI1-SOM (SIT48)          | 224734152263245223354613 |
| <b>B3</b>        | SB      | 5       | Jun 2011     | Feb 2016    | R/R/S/S                                    | Beijing (SIT1)            | 244233262544424183353823 |
| <b>B4</b>        | SB      | 6       | Aug 2011     | Jul 2016    | R/R/S/S                                    | Beijing (SIT1)            | 244233262544424183353823 |
| <b>E4</b>        | SB      | 13      | Dec 2003     | Aug 2016    | S/S/S/S                                    | EAI1-SOM (SIT48)          | 224734152263245223354613 |
| <b>B5</b>        | SB      | 5       | Oct 2011     | Aug 2016    | R/R/S/S                                    | Beijing (SIT1)            | 244233262544424183353823 |
| <b>E5</b>        | SB      | 11      | Feb 2006     | Nov 2016    | S/S/S/S                                    | EAI1-SOM (SIT48)          | 224734152263245223354613 |
| <b>E6</b>        | SB      | 21      | Jun 2002     | Nov 2016    | S/S/S/S                                    | EAI1-SOM (SIT48)          | 224734152263245223354613 |
| <b>B6</b>        | SB      | 5       | Oct 2012     | Feb 2017    | R/R/S/S                                    | Beijing (SIT1)            | 244233262544424183353823 |
| <b>E7</b>        | SB      | 18      | Oct 2000     | Mar 2017    | S/S/S/S                                    | EAI1-SOM (SIT48)          | 224744152263245223354613 |
| <b>B7</b>        | SB      | 5       | Nov 2011     | Mar 2017    | R/R/S/S                                    | Beijing (SIT1)            | 244233262544424183353823 |
| <b>E8</b>        | SB      | 17      | Aug 2003     | Mar 2017    | S/S/S/S                                    | EAI1-SOM (SIT48)          | 224734152263245223354613 |
| <b>E9</b>        | SB      | 22      | Oct 2004     | Mar 2017    | S/S/S/S                                    | EAI1-SOM (SIT48)          | 224734152263245223354613 |
| <b>E10</b>       | SB      | 10      | Feb 2007     | Mar 2017    | S/S/S/S                                    | EAI1-SOM (SIT48)          | 224734152263245223354613 |
| <b>E11</b>       | SB      | 11      | Jul 2006     | Mar 2017    | S/S/S/S                                    | EAI1-SOM (SIT48)          | 224734152263245223354613 |
| <b>E12</b>       | SB      | 11      | May 2006     | Mar 2017    | S/S/S/S                                    | EAI1-SOM (SIT48)          | 224734152263245223354613 |
| <b>E13</b>       | SB      | 24      | Aug 1996     | Nov 2017    | S/S/S/S                                    | EAI1-SOM (SIT48)          | Not done                 |
| <b>E14</b>       | SB      | 23      | Aug 2003     | Nov 2017    | S/S/S/S                                    | EAI1-SOM (SIT48)          | Not done                 |
| <b>B8</b>        | SB      | 8       | Jun 2010     | Nov 2017    | R/R/S/S                                    | Beijing (SIT1)            | Not done                 |
| <b>E15</b>       | SB      | 18      | Nov 2001     | Dec 2017    | S/S/S/S                                    | EAI1-SOM (SIT48)          | Not done                 |
| <b>B9</b>        | SB      | 5       | Mar 2013     | Feb 2018    | R/R/S/S                                    | Beijing (SIT1)            | Not done                 |
| <b>B10</b>       | SB      | 5       | Sep 2013     | Feb 2018    | R/R/S/S                                    | Beijing (SIT1)            | Not done                 |
| <b>E16</b>       | SB      | 23      | Nov 2001     | Aug 2018    | S/S/S/S                                    | EAI1-SOM (SIT48)          | Not done                 |
| <b>E17-ABB</b>   | ABB     | 9       | Jul 2010     | Nov 2018    | S/S/S/S                                    | EAI1-SOM (SIT48)          | Not done                 |
| <b>E18</b>       | SB      | 23      | Jun 1999     | Nov 2018    | S/S/S/S                                    | EAI1-SOM (SIT48)          | Not done                 |
| <b>E19</b>       | SB      | 24      | Apr 1999     | Dec 2018    | S/S/S/S                                    | EAI1-SOM (SIT48)          | Not done                 |
| <b>E20</b>       | SB      | 20      | Sep 2005     | Dec 2018    | S/S/S/S                                    | EAI1-SOM (SIT48)          | Not done                 |
| <b>E21</b>       | SB      | 27      | Apr 2005     | Mar 2019    | S/S/S/S                                    | EAI1-SOM (SIT48)          | Not done                 |

SB = sun bear; ABB = Asiatic black bear; NA = not applicable; SIT = Spoligo international type

R = resistant; S = susceptible; STM = streptomycin; INH = isoniazid; RIF = rifampicin; EMB = ethambutol

MIRU loci patterns are in the order 154, 424, 577, 580, 802, 960, 1644, 1955, 2059, 2163b, 2165, 2347, 2401, 2461, 2531, 2687, 2996, 3007, 3171, 3192, 3690, 4052, 4156, 4348

**Table S2.** Lineage and National Center for Biotechnology Information BioSample accession numbers for 100 successfully sequenced *Mycobacterium tuberculosis* isolates from 30 sun bears (*Helarctos malayanus*), one Asiatic black bear (*Ursus thibetanus*) and one human case at the Cambodia Bear Sanctuary, and including case and isolate references and sample origin

| Case ID    | Isolate reference <sup>A</sup> | Sample origin               | Lineage   | Accession number |
|------------|--------------------------------|-----------------------------|-----------|------------------|
| <b>B1</b>  | B1                             | Bronchoalveolar lavage      | Lineage 2 | SAMN37068676     |
|            | B1                             | Lung                        | Lineage 2 | SAMN37068677     |
|            | B1                             | Gastric fluid               | Lineage 2 | SAMN37068675     |
| <b>B2</b>  | B2a                            | Lung                        | Lineage 2 | SAMN37068678     |
|            | B2b                            | Lung                        | Lineage 2 | SAMN37068679     |
|            | B2b                            | Lung                        | Lineage 2 | SAMN37068681     |
|            | B2b                            | Pleural fluid               | Lineage 2 | SAMN37068680     |
| <b>Hu</b>  | Hu                             | Sputum                      | Lineage 2 | SAMN37068682     |
| <b>B3</b>  | B3a                            | Tracheal mucous             | Lineage 2 | SAMN37068688     |
|            | B3b                            | Bronchoalveolar lavage      | Lineage 2 | SAMN37068689     |
| <b>B4</b>  | B4a                            | Bronchoalveolar lavage      | Lineage 2 | SAMN37068690     |
|            | B4a                            | Wound                       | Lineage 2 | SAMN37068692     |
|            | B4a                            | Wound                       | Lineage 2 | SAMN37068693     |
|            | B4a                            | Oral swab                   | Lineage 2 | SAMN37068691     |
|            | B4b                            | Lung                        | Lineage 2 | SAMN37068694     |
| <b>B5</b>  | B5a                            | Lung                        | Lineage 2 | SAMN37068699     |
|            | B5b                            | Cervical lymph node         | Lineage 2 | SAMN37068698     |
|            | B5b                            | Oral biopsy                 | Lineage 2 | SAMN37068695     |
| <b>B6</b>  | B6a                            | Lung                        | Lineage 2 | SAMN37068707     |
|            | B6a                            | Peritoneal fluid            | Lineage 2 | SAMN37068705     |
|            | B6a                            | Sub-cutaneous tissue        | Lineage 2 | SAMN37068706     |
|            | B6a                            | Intestinal abscess          | Lineage 2 | SAMN37068708     |
| <b>B7</b>  | B7a                            | Mesenteric lymph node       | Lineage 2 | SAMN37068713     |
|            | B7b                            | Tongue lesion               | Lineage 2 | SAMN37068715     |
|            | B7b                            | Small intestine             | Lineage 2 | SAMN37068714     |
|            | B7c                            | Lung                        | Lineage 2 | SAMN37068716     |
| <b>B8</b>  | B8                             | Submandibular lymph node    | Lineage 2 | SAMN37068736     |
|            | B8                             | Tracheobronchial lymph node | Lineage 2 | SAMN37068735     |
| <b>B9</b>  | B9                             | Submandibular lymph node    | Lineage 2 | SAMN37068743     |
| <b>B10</b> | B10                            | Tracheobronchial lymph node | Lineage 2 | SAMN37068744     |
|            | B10                            | Mesenteric lymph node       | Lineage 2 | SAMN37068745     |
| <b>E1</b>  | E1                             | Bronchoalveolar lavage      | Lineage 1 | SAMN37068683     |
| <b>E2</b>  | E2                             | Bronchoalveolar lavage      | Lineage 1 | SAMN37068684     |
| <b>E3</b>  | E3a                            | Lung                        | Lineage 1 | SAMN37068686     |
|            | E3a                            | Pleural fluid               | Lineage 1 | SAMN37068687     |
|            | E3b                            | Lung                        | Lineage 1 | SAMN37068685     |
| <b>E4</b>  | E4                             | Bronchoalveolar lavage      | Lineage 1 | SAMN37068696     |
|            | E4                             | Lung                        | Lineage 1 | SAMN37068697     |
| <b>E5</b>  | E5                             | Bronchoalveolar lavage      | Lineage 1 | SAMN37068700     |
|            | E5                             | Lung                        | Lineage 1 | SAMN37068703     |
|            | E5                             | Faeces                      | Lineage 1 | SAMN37068702     |
| <b>E6</b>  | E6                             | Lung                        | Lineage 1 | SAMN37068704     |
|            | E6                             | Faeces                      | Lineage 1 | SAMN37068701     |
| <b>E7</b>  | E7                             | Bronchoalveolar lavage      | Lineage 1 | SAMN37068710     |
|            | E7                             | Lung                        | Lineage 1 | SAMN37068712     |
|            | E7                             | Tracheal mucous             | Lineage 1 | SAMN37068709     |
|            | E7                             | Pleural fluid               | Lineage 1 | SAMN37068711     |
|            | E7                             | Faeces                      | Lineage 1 | SAMN37068717     |
| <b>E8</b>  | E8                             | Bronchoalveolar lavage      | Lineage 1 | SAMN37068718     |
|            | E8                             | Lung                        | Lineage 1 | SAMN37068720     |
|            | E8                             | Faeces                      | Lineage 1 | SAMN37068719     |
| <b>E9</b>  | E9                             | Lung                        | Lineage 1 | SAMN37068721     |
| <b>E10</b> | E10a                           | Lung                        | Lineage 1 | SAMN37068722     |
|            | E10b                           | Bronchoalveolar lavage      | Lineage 1 | SAMN37068723     |
| <b>E11</b> | E11                            | Lung                        | Lineage 1 | SAMN37068725     |
|            | E11                            | Faeces                      | Lineage 1 | SAMN37068726     |
| <b>E12</b> | E12                            | Lung                        | Lineage 1 | SAMN37068724     |
| <b>E13</b> | E13                            | Bronchoalveolar lavage      | Lineage 1 | SAMN37068729     |
|            | E13                            | Lung                        | Lineage 1 | SAMN37068728     |

|                |         |                             |           |              |
|----------------|---------|-----------------------------|-----------|--------------|
|                | E13     | Tarsal joint cartilage      | Lineage 1 | SAMN37068727 |
| <b>E14</b>     | E14     | Bronchoalveolar lavage      | Lineage 1 | SAMN37068732 |
|                | E14     | Lung                        | Lineage 1 | SAMN37068734 |
|                | E14     | Tracheobronchial lymph node | Lineage 1 | SAMN37068730 |
|                | E14     | Mediastinal lymph node      | Lineage 1 | SAMN37068733 |
|                | E14     | Liver                       | Lineage 1 | SAMN37068731 |
| <b>E15</b>     | E15     | Bronchoalveolar lavage      | Lineage 1 | SAMN37068741 |
|                | E15     | Lung                        | Lineage 1 | SAMN37068737 |
|                | E15     | Lung                        | Lineage 1 | SAMN37068738 |
|                | E15     | Pleural fluid               | Lineage 1 | SAMN37068742 |
|                | E15     | Tracheobronchial lymph node | Lineage 1 | SAMN37068739 |
|                | E15     | Mesenteric lymph node       | Lineage 1 | SAMN37068740 |
| <b>E16</b>     | E16     | Wound                       | Lineage 1 | SAMN37068746 |
|                | E16     | Wound                       | Lineage 1 | SAMN37068747 |
|                | E16     | Wound                       | Lineage 1 | SAMN37068748 |
|                | E16     | Mediastinal lymph node      | Lineage 1 | SAMN37068749 |
| <b>E17-ABB</b> | E17-ABB | Bronchoalveolar lavage      | Lineage 1 | SAMN37068752 |
|                | E17-ABB | Lung                        | Lineage 1 | SAMN37068751 |
|                | E17-ABB | Liver                       | Lineage 1 | SAMN37068750 |
| <b>E18</b>     | E18a    | Bronchoalveolar lavage      | Lineage 1 | SAMN37068757 |
|                | E18a    | Lung                        | Lineage 1 | SAMN37068754 |
|                | E18a    | Mediastinal lymph node      | Lineage 1 | SAMN37068753 |
|                | E18a    | Tracheobronchial lymph node | Lineage 1 | SAMN37068759 |
|                | E18a    | Mesenteric lymph node       | Lineage 1 | SAMN37068758 |
|                | E18b    | Prescapular lymph node      | Lineage 1 | SAMN37068755 |
|                | E18c    | Prescapular abscess         | Lineage 1 | SAMN37068756 |
| <b>E19</b>     | E19     | Bronchoalveolar lavage      | Lineage 1 | SAMN37068760 |
|                | E19     | Lung                        | Lineage 1 | SAMN37068762 |
|                | E19     | Tracheobronchial lymph node | Lineage 1 | SAMN37068761 |
|                | E19     | Mesenteric lymph node       | Lineage 1 | SAMN37068764 |
|                | E19     | Peritoneal fluid            | Lineage 1 | SAMN37068763 |
| <b>E20</b>     | E20     | Lung                        | Lineage 1 | SAMN37068768 |
|                | E20     | Mediastinal lymph node      | Lineage 1 | SAMN37068765 |
|                | E20     | Spleen                      | Lineage 1 | SAMN37068766 |
|                | E20     | Liver                       | Lineage 1 | SAMN37068767 |
|                | E20     | Faeces                      | Lineage 1 | SAMN37068769 |
| <b>E21</b>     | E21     | Bronchoalveolar lavage      | Lineage 1 | SAMN37068770 |
|                | E21     | Lung                        | Lineage 1 | SAMN37068772 |
|                | E21     | Submandibular lymph node    | Lineage 1 | SAMN37068774 |
|                | E21     | Mediastinal lymph node      | Lineage 1 | SAMN37068773 |
|                | E21     | Mesenteric lymph node       | Lineage 1 | SAMN37068771 |

^Isolates from each case with no genetic variation are grouped together and referred to by the case ID and a lower-case letter
